# Supplementary material for: Lignocellulosic Materials Used as Biosorbents for the Capture of Nickel (II) in Aqueous Solution
Source: MDPI journal article supplement (doi:10.3390/app12020933), 2022-01-17
Supplement: s1 [file s1]

# Lignocellulosic materials used as biosorbents for the capture of nickel (II) in aqueous solution

Luísa Cruz-Lopes<sup>1\*</sup>, Morgana Macena<sup>1</sup>, Bruno Esteves<sup>1</sup>, Isabel Santos-Vieira<sup>2</sup>

1 CERNAS Research Centre, School of Technology and Management,  
Polytechnic Institute of Viseu, 3504-510 Viseu, Portugal;

lvalente@estgv.ipv.pt

esrgv17498@alunos.estgv.ipv.pt

bruno@estgv.ipv.pt

2 CICECO—Aveiro Institute of Materials, Department of Chemistry, University  
of Aveiro, 3810-193 Aveiro, Portugal;

ivieira@ua.pt

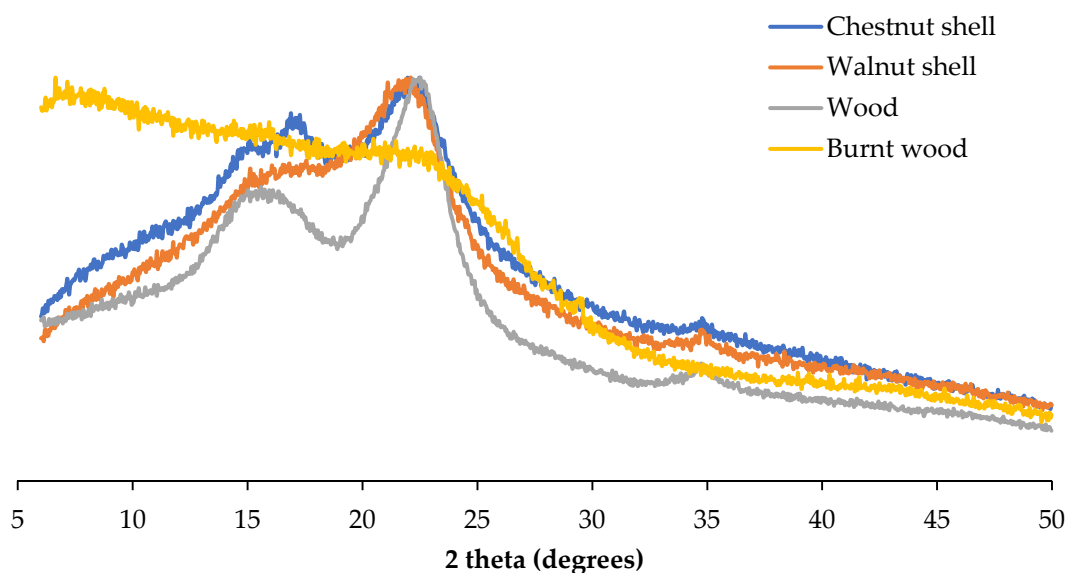

Figure S1 - Powder X-ray diffraction of all the materials.

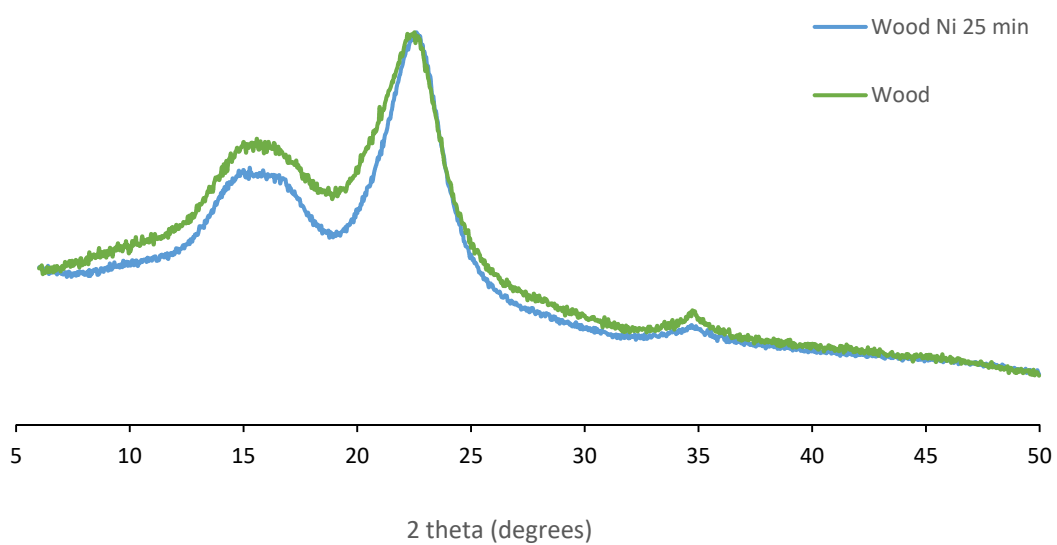

Figure S2 - Powder X-ray diffraction of wood before and after reaction.

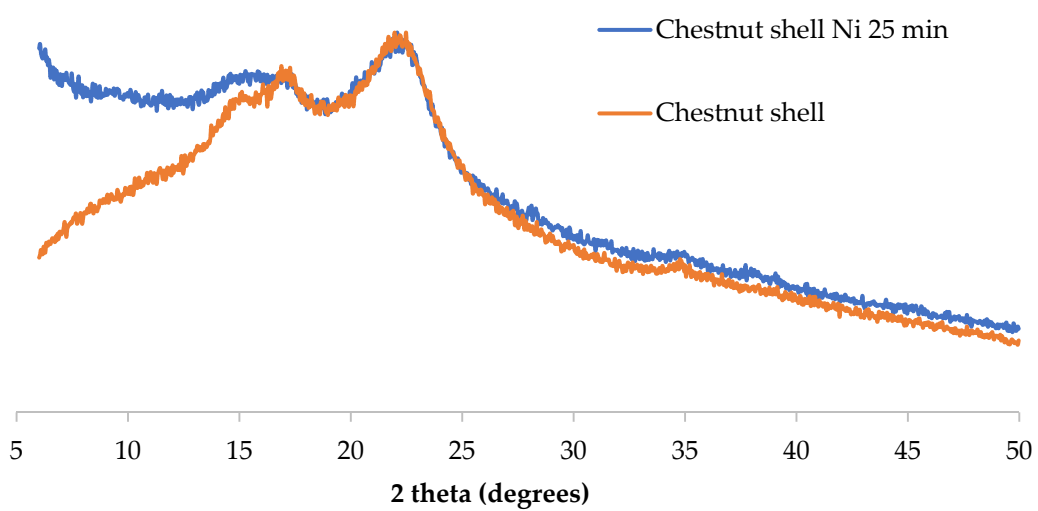

Figure S3 - Powder X-ray diffraction of chestnut shell before and after reaction.

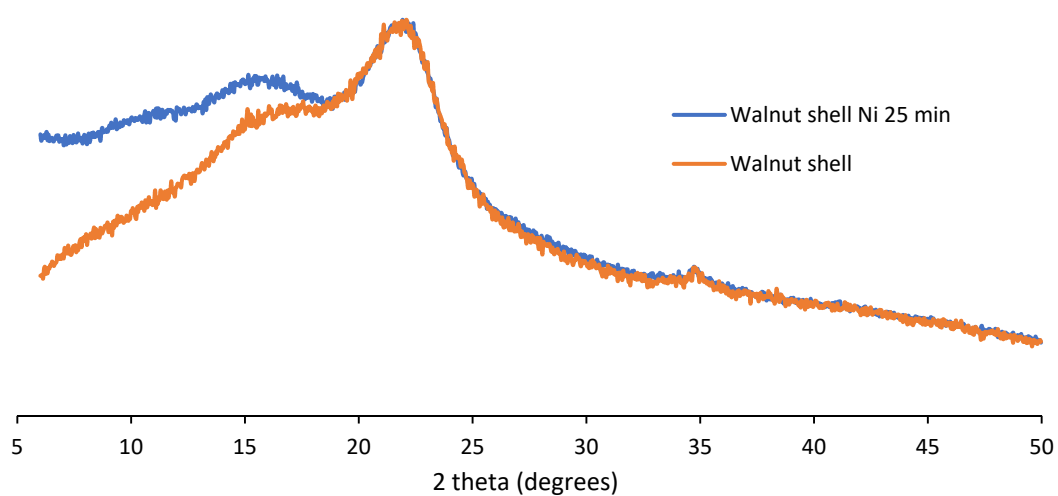

Figure S4 - Powder X-ray diffraction of walnut shell before and after reaction.

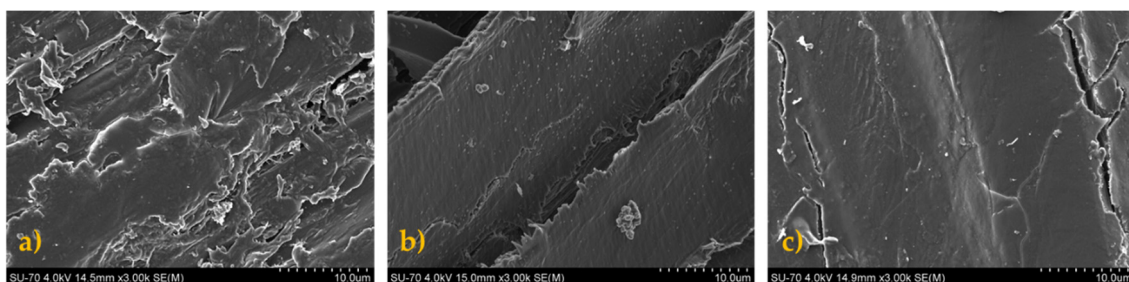

Figure S5 – SEM images from wood a) before, b) after 10 min of reaction and c) after 25 min of reaction.

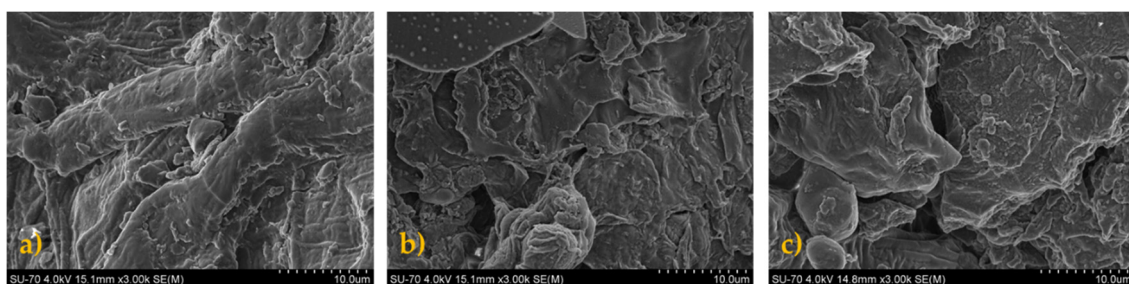

Figure S6 – SEM images from chestnut shell a) before, b) after 10 min of reaction and c) after 25 min of reaction.

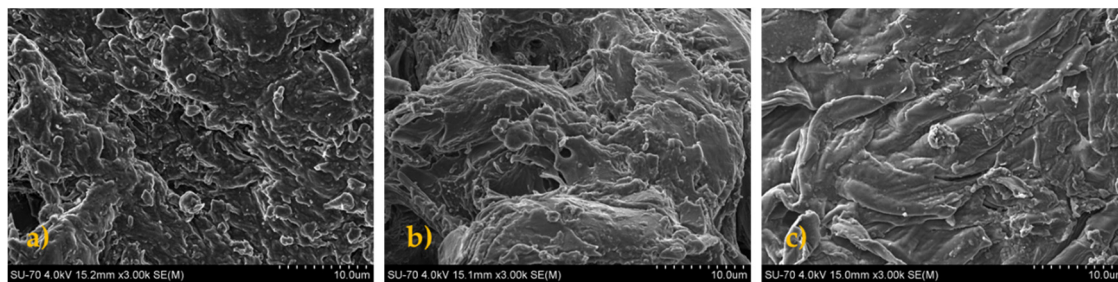

Figure S7 – SEM images from walnut shell a) before, b) after 10 min of reaction and c) after 25 min of reaction.

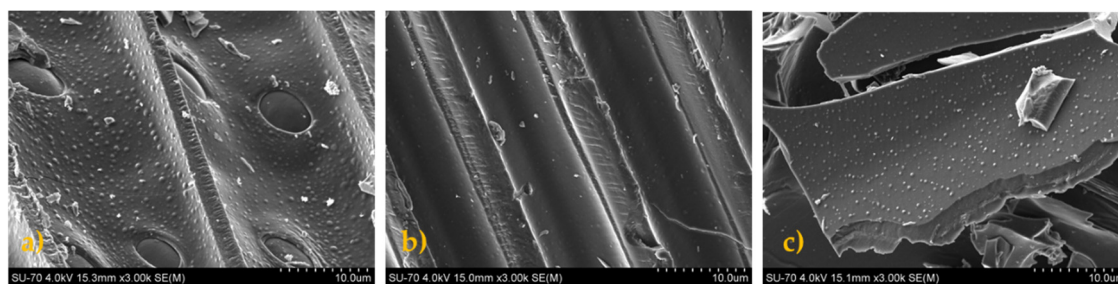

Figure S8 – SEM images from burnt wood a) before, b) after 10 min of reaction and c) after 25 min of reaction.
